# Supplementary material for: Low temperature synthesis of BiFeO3nanoparticles with enhanced magnetization and promising photocatalytic performance in dye degradation and hydrogen evolution
Source: Royal Society of Chemistry journal article supplement (doi:10.1039/c8ra04599b), 2018-01-01
Supplement: c8ra04599b1.pdf [file c8ra04599b1.pdf]

*Supplementary Information*

**Low temperature synthesis of BiFeO<sub>3</sub> nanoparticles with enhanced magnetization and promising photocatalytic performance in dye degradation and hydrogen evolution**

*M. A. Basith, Nilufar Yesmin, Rana Hossain*

*Department of Physics, Bangladesh University of Engineering and Technology, Dhaka-1000, Bangladesh*

Table-S1: Rietveld Refined structural parameters and phases present (in wt %) obtained from powder XRD

| Sample                                                          | Crystal Structure                                                                                                             | Lattice Parameters (Å)                     | Atomic Coordinates                                                                                                                                                                                | R Factor                                           |
|-----------------------------------------------------------------|-------------------------------------------------------------------------------------------------------------------------------|--------------------------------------------|---------------------------------------------------------------------------------------------------------------------------------------------------------------------------------------------------|----------------------------------------------------|
| BFO Bulk                                                        | BFO(R3c)<br>(Rhombohedral)<br>Fract (%):<br>79.79(0)<br>Vol:<br>373.370(0.004)                                                | a=b=5.5764(2)<br>c=13.8640(1)              | Bi (0,0,0)<br>Fe (0,0, 0.2202)<br>O(0.4478, 0.0006, 0.9545)                                                                                                                                       | $\chi^2 = 2.30$<br>$R_p = 1.21$<br>$R_{wp} = 1.69$ |
|                                                                 | Bi <sub>2</sub> Fe <sub>4</sub> O <sub>9</sub> (pbam)<br>(Orthorhombic)<br>Fract(%): 8.69 (0)<br>Vol:<br>404.169(0.035)       | a =8.4433(4)<br>b=7.9723(4)<br>c=6.0043(3) | Bi (0.17524, 0.17916, 0)<br>Fe1 (0.5, 0, 0.27910)<br>Fe2 (0.35714, 0.35660,0.5)<br>O1 (0, 0, 0.5)<br>O2(0.27003, 0.73403,-0.34894)<br>O3 (0.83303, 0.72656, 0.5)<br>O4(0.46749, 0.13604, 0.88808) |                                                    |
|                                                                 | BFO(pnma)<br>(Orthorhombic)<br>Fract (%): 4.86(0)<br>Vol:<br>99.962(0.063)                                                    | a=3.6953(6)<br>b=4.1502(15)<br>c=6.517(3)  | Bi (0.07672, -0.54738, -0.10374)<br>Fe (0.64829, 0.72185, 0.62450)<br>O1 (-0.29397, 0.39633, -0.14315)<br>O2 (0.26305, -0.27487, -0.34784)<br>O3 (0.08274, -0.34590, 0.07061)                     |                                                    |
|                                                                 | Bi <sub>25</sub> FeO <sub>40</sub> (I23)<br>(Cubic)<br>Fract(%): 6.66(0)<br>Vol:<br>1050.261(0.072)                           | a=b=c=<br>10.1648(4)                       | Bi (0.69420, -0.87266, 0.57740)<br>Bi/Fe (0,0,0)<br>O1(0.10396, 0.10328, 0.29397)<br>O2 (0.69383, -0.50582, 0.22787)<br>O3(0.75608, 0.75608, 0.75608)                                             |                                                    |
| Bi <sub>12.5</sub> Fe <sub>0.5</sub> O <sub>19.5</sub><br>120°C | Bi <sub>12.5</sub> Fe <sub>0.5</sub> O <sub>19.5</sub><br>(I23)<br>(Cubic)<br>Fract(%):<br>50.23(0.62)<br>Vol:1049.414(0.049) | a=b=c=<br>10.1620(3)                       | Bi1 (0.1782, 0.3149, 0.0139)<br>Fe (0,0,0)<br>Bi2 (-0.0310, -0.0310, -0.0310)<br>O1 (0.1336, 0.2364, 0.5141)<br>O2 (0.1694, 0.1694, 0.1694)<br>O3 (0.8937, 0.8937, 0.8937)                        | $\chi^2 = 1.37$<br>$R_p = 3.52$<br>$R_{wp} = 4.82$ |

|                                         |                                                                                                                                    |                                           |                                                                                                                                                                           |                                                    |
|-----------------------------------------|------------------------------------------------------------------------------------------------------------------------------------|-------------------------------------------|---------------------------------------------------------------------------------------------------------------------------------------------------------------------------|----------------------------------------------------|
|                                         | Bi <sub>2</sub> O <sub>3</sub> (P121/c)<br>(Monoclinic)<br>Fract(%):<br>49.40(0.88)<br>Vol:<br>328.746(0.025)                      | a=5.8406(3)<br>b=8.1557(3)<br>c=7.4977(4) | Bi1 (0.5257, 0.1885, 0.6384)<br>Bi2 (0.0379, 0.0424, 0.2253)<br>O1 (0.6150, 0.2780, 0.3160)<br>O2 (0.6481, -0.0095, 0.0945)<br>O3 (0.0189, 0.0918, 0.4769)                |                                                    |
| Bi <sub>2</sub> O <sub>3</sub><br>140°C | Bi <sub>12.5</sub> Fe <sub>0.5</sub> O <sub>19.5</sub> (I2<br>3)<br>(Cubic)<br>Fract(%):<br>29.98(0.32)<br>Vol:1050.125(0.0<br>36) | a=b=c=<br>10.1643(2)                      | Bi1 (0.1775, 0.3132, 0.0109)<br>Fe (0,0,0)<br>Bi2 -0.0205, -0.0205, -0.0205)<br>O1 (0.1257, 0.2617, 0.5488)<br>O2 (0.1778, 0.1778, 0.1778)<br>O3 (0.8892, 0.8892, 0.8892) | $\chi^2 = 1.18$<br>$R_p = 3.87$<br>$R_{wp} = 4.92$ |
|                                         | Bi <sub>2</sub> O <sub>3</sub> (P121/c)<br>(Monoclinic)<br>Fract(%):<br>70.02(0.55)<br>Vol: 329.463(<br>0.020)                     | a=5.8443(2)<br>b=8.1618(2)<br>c=7.5053(3) | Bi1 (0.5296, 0.1835, 0.6368)<br>Bi2 (0.0418, 0.0421, 0.2201)<br>O1 (0.6377, 0.2910, 0.3843)<br>O2 (0.7170, -0.0619, 0.1571)<br>O3 (0.0189, 0.0918, 0.4769)                |                                                    |
| BFO<br>160°C                            | BFO (R3c)<br>(Rhombohedral)<br>Fract(%): 100(0)<br>Vol:<br>373.327(0.014)                                                          | a = b =5.5758(1)<br>c =13.8656(4)         | Bi (0,0,0)<br>Fe (0,0, 0.2215)<br>O (0.4598, 0.0184, 0.9519)                                                                                                              | $\chi^2 = 1.75$<br>$R_p = 5.58$<br>$R_{wp} = 7.27$ |
| BFO<br>180°C                            | BFO (R3c)<br>(Rhombohedral)<br>Fract(%):<br>98.24(0.01)<br>Vol:<br>373.314(0.01)                                                   | a = b =5.5761(1)<br>c =13.8634(3)         | Bi (0,0,0)<br>Fe (0,0, 0.2198)<br>O (0.4694, 0.0247, 0.95)                                                                                                                | $\chi^2 = 1.54$<br>$R_p = 5.42$<br>$R_{wp} = 7.19$ |
| BFO<br>200°C                            | BFO(R3c)<br>(Rhombohedral)<br>Fract (%): 100(0)<br>Vol:<br>373.24(0.085)                                                           | a = b =5.5754 (1)<br>c =13.8645 (4)       | Bi (0,0,0)<br>Fe (0,0, 0.2248)<br>O (0.4556, 0.0238, 0.9398)                                                                                                              | $\chi^2 = 1.93$<br>$R_p = 5.85$<br>$R_{wp} = 7.64$ |
